# Supplementary material
Source: ML conference proceedings conference paper supplement (https://proceedings.mlr.press/v119/lei20a.html)
Supplement: Supplementary file [file lei20a-supp.pdf]

---

# Supplementary Material for Analytic Marching: An Analytic Meshing Solution from Deep Implicit Surface Networks

---

Jiabao Lei <sup>1 2</sup> Kui Jia <sup>1 2</sup>

## 1. Proof of Theorem 5

*Proof.* The proof proceeds by first showing that each planar face on the surface  $\mathcal{Z}$  captured by the SDF  $F = f \circ \mathbf{T}$  uniquely corresponds to an analytic face of an analytic cell, and then showing that for any pair of planar faces connected on  $\mathcal{Z}$ , their corresponding analytic faces are connected via boundaries of their respective analytic cells.

Let  $\mathcal{P}_1$  denote a planar face on the surface  $\mathcal{Z}$ , and  $\mathbf{n}_1 \in \mathbb{R}^3$  be its normal. We have  $\mathbf{n}_1^\top \mathbf{x} = 0 \forall \mathbf{x} \in \mathcal{P}_1$ . Equation (8) tells that  $\mathbf{n}_1$  must be proportional at least to one of  $\{\mathbf{a}_F^r | r \in \mathcal{R}\}$ . By the unique plane condition, i.e., each of  $\{\mathbf{a}_F^r | r \in \mathcal{R}\}$  is uniquely defined, we have  $\mathbf{n}_1 \propto \mathbf{a}_F^{r_1^\top}$  of a certain region  $r_1$ . Assume  $r_1$  is not an analytic cell, which suggests that there exists no intersection between  $\mathbf{a}_F^{r_1}$  and  $r_1$  and we have  $\mathbf{a}_F^{r_1^\top} \mathbf{x} = \mathbf{n}_1^\top \mathbf{x} \neq 0$  for all  $\mathbf{x} \in r_1$ , and thus  $\mathcal{P}_1 \cap r_1 = \emptyset$ ; it suggests that the normal  $\mathbf{n}_1$  of  $\mathcal{P}_1$  is induced in a different region  $r_1'$  by  $\mathbf{n}_1 \propto \mathbf{a}_F^{r_1'} = \mathbf{w}_f^\top \mathbf{T}^{r_1'}$ , which contradicts with the assumed unique plane condition. We thus have that  $r_1$  must be an analytic cell.

Let  $\mathbf{n}_1 \propto \mathbf{a}_F^{\tilde{r}_1^\top}$  of a certain analytic cell  $\tilde{r}_1 \in \tilde{\mathcal{R}}$  (or  $\mathcal{C}_F^{\tilde{r}_1}$ ), and we have the analytic face  $\mathcal{P}_F^{\tilde{r}_1} \subseteq \mathcal{P}_1$ . Assume there exist  $\mathcal{P}_1 - \mathcal{P}_F^{\tilde{r}_1} = \{\mathbf{x} \in \mathcal{Z} | \mathbf{x} \in \mathcal{P}_1, \mathbf{x} \notin \mathcal{P}_F^{\tilde{r}_1}\}$ , which means that for any  $\mathbf{x} \in \mathcal{P}_1 - \mathcal{P}_F^{\tilde{r}_1}$ , it resides in an analytic face  $\mathcal{P}_F^{\tilde{r}_1'}$  of a different cell  $\mathcal{C}_F^{\tilde{r}_1'}$ ; since  $\mathbf{x} \in \mathcal{P}_1$ , we have  $\mathbf{n}_1 \propto \mathbf{a}_F^{\tilde{r}_1'^\top}$  and thus  $\mathbf{a}_F^{\tilde{r}_1} \propto \mathbf{a}_F^{\tilde{r}_1'}$ , which contradicts with the unique plane condition of  $\mathbf{a}_F^{\tilde{r}_1} \not\propto \mathbf{a}_F^{\tilde{r}_1'}$ . We thus have  $\mathcal{P}_1 = \mathcal{P}_F^{\tilde{r}_1}$  and  $\mathcal{P}_1 \subset \mathcal{C}_F^{\tilde{r}_1}$ . By the definition (12) of analytic face, the above argument also tells that planar faces on  $\mathcal{Z}$  and analytic faces  $\{\mathcal{C}_F^{\tilde{r}} | \tilde{r} \in \tilde{\mathcal{R}}\}$  are one-to-one corresponded.

Assume  $\mathcal{P}_1$  connects with another planar face  $\mathcal{P}_2$  on a shared edge segment  $\mathcal{E} = \{\mathbf{x} \in \mathcal{Z} | \mathbf{x} \in \mathcal{P}_1, \mathbf{x} \in \mathcal{P}_2\}$ . Define

---

<sup>1</sup>School of Electronic and Information Engineering, South China University of Technology, Guangzhou, Guangdong, China <sup>2</sup>Pazhou Lab, Guangzhou, 510335, China. Correspondence to: Kui Jia <kuijia@scut.edu.cn>.

the normal of  $\mathcal{P}_2$  as  $\mathbf{n}_2 \in \mathbb{R}^3$ , we have  $\mathbf{n}_1 \not\propto \mathbf{n}_2$ . Let  $\mathcal{P}_2 \subset \mathcal{C}_F^{\tilde{r}_2}$ , and we thus have  $\mathcal{E} \subset \mathcal{C}_F^{\tilde{r}_1}$  and  $\mathcal{E} \subset \mathcal{C}_F^{\tilde{r}_2}$ , which tells that the two cells  $\mathcal{C}_F^{\tilde{r}_1}$  and  $\mathcal{C}_F^{\tilde{r}_2}$  connect at least on  $\mathcal{E}$ . Due to the monotonous and convex nature of linear analytic cells  $\{\mathcal{C}_F^{\tilde{r}} | \tilde{r} \in \tilde{\mathcal{R}}\}$ ,  $\mathcal{E}$  must be on the boundaries of both  $\mathcal{C}_F^{\tilde{r}_1}$  and  $\mathcal{C}_F^{\tilde{r}_2}$ , and the boundaries of  $\mathcal{C}_F^{\tilde{r}_1}$  and  $\mathcal{C}_F^{\tilde{r}_2}$  share at least on  $\mathcal{E}$ . There exist two cases for the connection of cell boundaries on  $\mathcal{E}$ : (1) in the general case,  $\mathcal{C}_F^{\tilde{r}_1}$  and  $\mathcal{C}_F^{\tilde{r}_2}$  share a boundary  $\mathcal{B}_F^{\tilde{r}_1 \tilde{r}_2}$  defined by a hyperplane  $H_{l_k}^{\tilde{r}_1 \tilde{r}_2} = \{\mathbf{x} \in \mathbb{R}^3 | \mathbf{a}_{l_k}^{\tilde{r}_1 \tilde{r}_2} \mathbf{x} = 0\}$ , and we have  $\mathcal{E} \in \mathcal{B}_F^{\tilde{r}_1 \tilde{r}_2}$ , which, based on Corollary 4 and Definition 2, suggests that the two cells have a switching neuron state  $s_{lk}(\mathbf{x}) \forall \mathbf{x} \in \mathcal{B}_F^{\tilde{r}_1 \tilde{r}_2}$ , and consequently a switching neuron state  $s_{lk}(\mathbf{x}) \forall \mathbf{x} \in \mathcal{E}$ ; (2) in some rare case,  $\mathcal{E}$  coincides with a cell edge of  $\mathcal{C}_F^{\tilde{r}_1}$  defined by  $\{\mathbf{x} \in \mathbb{R}^3 | \mathbf{a}_{l_1 k_1}^{\tilde{r}_1} \mathbf{x} = 0, \mathbf{a}_{l_1' k_1'}^{\tilde{r}_1} \mathbf{x} = 0\}$ , and a cell edge of  $\mathcal{C}_F^{\tilde{r}_2}$  defined by  $\{\mathbf{x} \in \mathbb{R}^3 | \mathbf{a}_{l_2 k_2}^{\tilde{r}_2} \mathbf{x} = 0, \mathbf{a}_{l_2' k_2'}^{\tilde{r}_2} \mathbf{x} = 0\}$ , and it is not necessary that  $l_1 k_1$  and  $l_2 k_2$  specify the same neuron, and  $l_1' k_1'$  and  $l_2' k_2'$  specify another same neuron. Due to a phenomenon similar to the blessing of (high) dimensionality (Gorban & Tyukin, 2018), the second case of coincidence is expected to happen with a low probability. In any of the two cases, the boundaries  $\mathcal{C}_F^{\tilde{r}_1}$  and  $\mathcal{C}_F^{\tilde{r}_2}$  respectively associated with  $\mathcal{P}_1$  and  $\mathcal{P}_2$  connect on  $\mathcal{E}$ .

Since for any pair of planar faces  $\mathcal{P}_1$  and  $\mathcal{P}_2$  connected on  $\mathcal{Z}$ , we prove that they are uniquely corresponded to a pair of analytic faces  $\mathcal{P}_F^{\tilde{r}_1}$  and  $\mathcal{P}_F^{\tilde{r}_2}$ , which are connected via boundaries of their respective analytic cells  $\mathcal{C}_F^{\tilde{r}_1}$  and  $\mathcal{C}_F^{\tilde{r}_2}$ . The theorem is proved.  $\square$

## 2. More qualitative results

We show additional qualitative results for the categories of “Airplane”, “Rifle”, “Chair”, and “Table” in Figures 1, 2, 3, and 4. To help understand the polygonal mesh produced by analytic marching, we further zoom in the focused area of our “Sofa” result reported in Figure 3 of the main text, and show the zoomed result in Figure 5. Note that the polygonal mesh produced by analytic marching can be easily converted as triangle mesh, simply by connecting diagonals on individual polygonal faces.

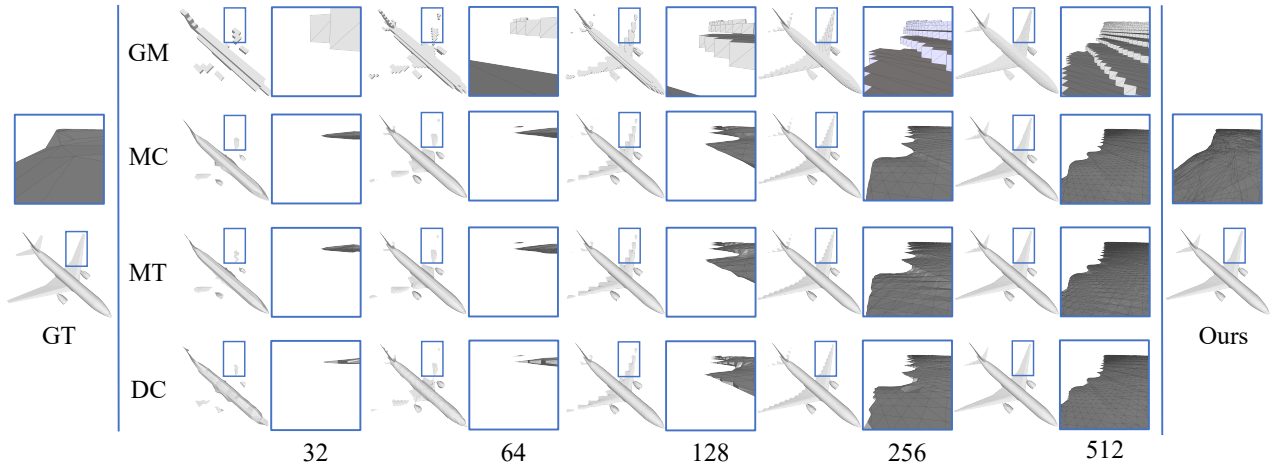

Figure 1. Qualitative comparisons of different meshing algorithms. For greedy meshing (GM), marching cubes (MC), marching tetrahedra (MT), and dual contouring (DC), results under a resolution range of discrete point sampling from  $32^3$  to a GPU memory limit of  $512^3$  are presented.

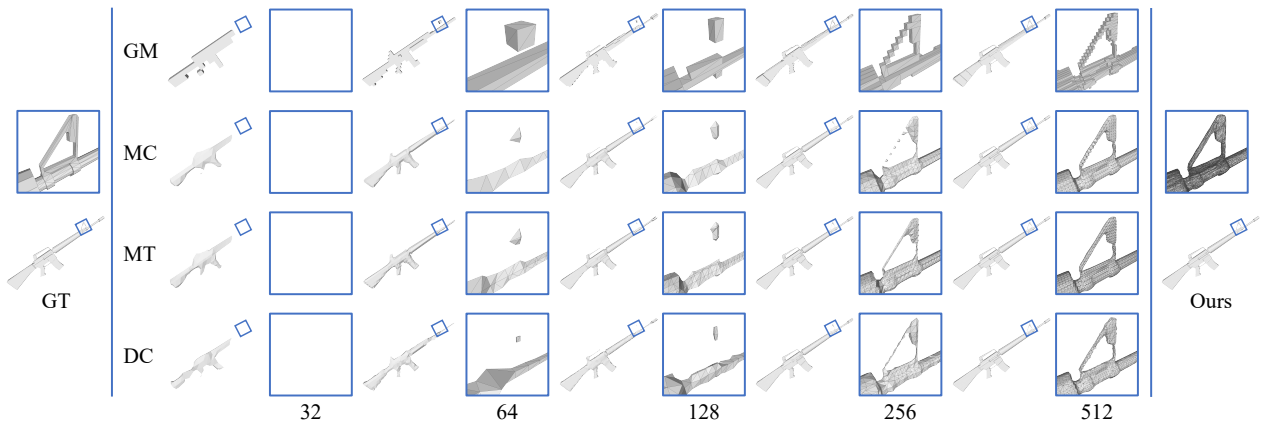

Figure 2. Qualitative comparisons of different meshing algorithms. For greedy meshing (GM), marching cubes (MC), marching tetrahedra (MT), and dual contouring (DC), results under a resolution range of discrete point sampling from  $32^3$  to a GPU memory limit of  $512^3$  are presented.

### 3. Numerical results

We show in Table 1 the numerical results corresponding to the plotted curves in Figure 2 of the main text.

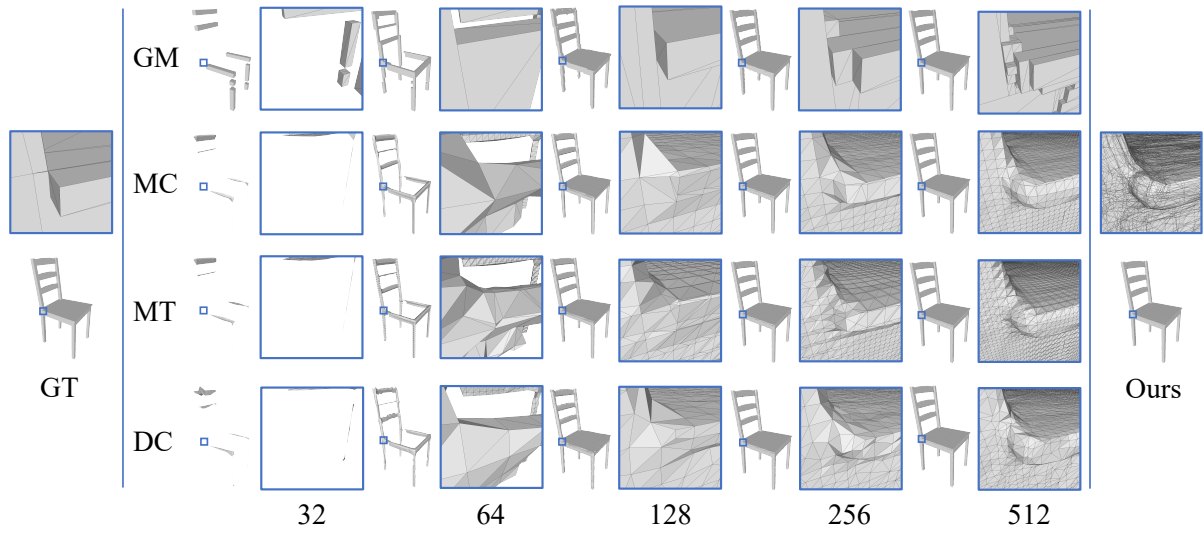

Figure 3. Qualitative comparisons of different meshing algorithms. For greedy meshing (GM), marching cubes (MC), marching tetrahedra (MT), and dual contouring (DC), results under a resolution range of discrete point sampling from  $32^3$  to a GPU memory limit of  $512^3$  are presented.

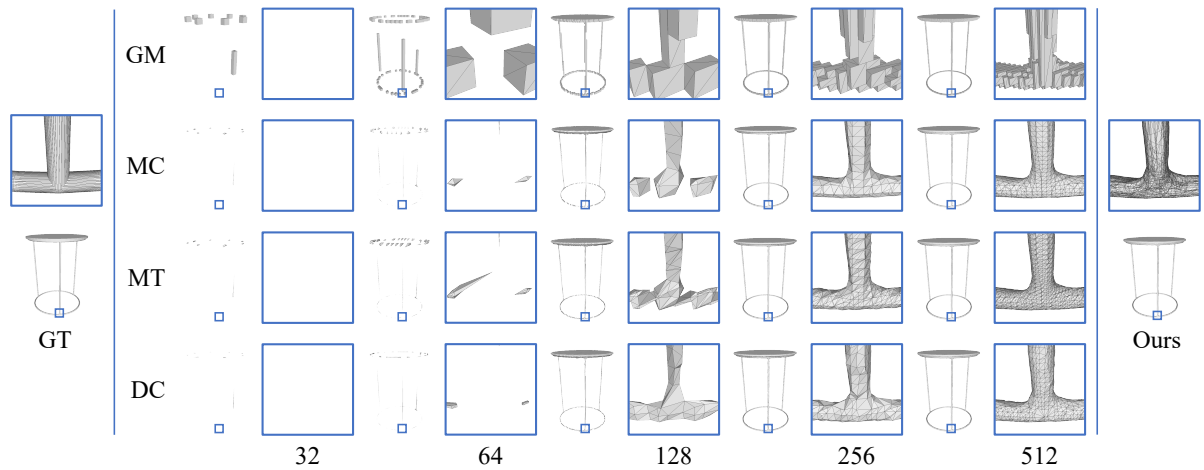

Figure 4. Qualitative comparisons of different meshing algorithms. For greedy meshing (GM), marching cubes (MC), marching tetrahedra (MT), and dual contouring (DC), results under a resolution range of discrete point sampling from  $32^3$  to a GPU memory limit of  $512^3$  are presented.

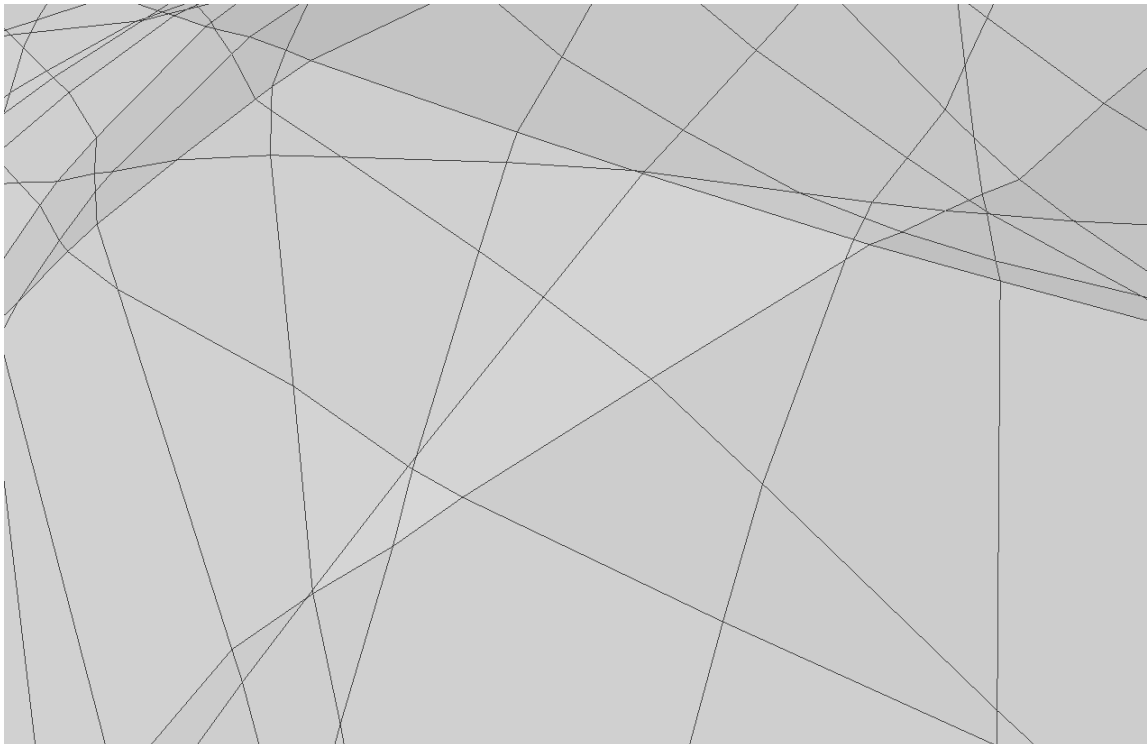

Figure 5. A local surface area of the polygonal mesh produced by analytic marching, which is obtained by further zooming in the focused area of our “Sofa” result reported in Figure 3 of the main text. Note that the polygonal mesh produced by analytic marching can be easily converted as triangle mesh, simply by connecting diagonals on individual polygonal faces.

Table 1. Numerical results of different meshing algorithms under metrics of recovery precision and inference world-clock time. For greedy meshing (GM), marching cubes (MC), marching tetrahedra (MT), and dual contouring (DC), results under a resolution range of discrete point sampling from  $32^3$  to a GPU memory limit of  $512^3$  are presented, and the dominating computations of their sampled points’ SDF values are implemented on GPU.

| Algorithms | CD( $\times 10^{-1}$ ) | EMD( $\times 10^{-3}$ ) | IoU(%) | F@ $\tau$ (%) | F@ $2\tau$ (%) | Time(sec.) |
|------------|------------------------|-------------------------|--------|---------------|----------------|------------|
| MC32       | 37.280                 | 25.368                  | 72.266 | 39.805        | 78.332         | 2.25       |
| MC64       | 6.4457                 | 8.8759                  | 88.461 | 61.098        | 96.116         | 2.41       |
| MC128      | 5.5740                 | 6.7293                  | 91.348 | 66.585        | 97.194         | 3.41       |
| MC256      | 5.5731                 | 6.5415                  | 91.410 | 66.773        | 97.202         | 14.0       |
| MC512      | 5.5730                 | 6.5403                  | 91.445 | 66.777        | 97.205         | 156        |
| GM32       | 45.599                 | 23.918                  | 63.356 | 19.725        | 55.441         | 2.41       |
| GM64       | 11.006                 | 11.259                  | 76.122 | 32.580        | 88.112         | 2.50       |
| GM128      | 6.8142                 | 8.0922                  | 85.078 | 53.570        | 96.793         | 3.40       |
| GM256      | 5.9424                 | 6.9674                  | 88.446 | 63.411        | 97.008         | 14.2       |
| GM512      | 5.7248                 | 6.7480                  | 90.098 | 65.548        | 97.015         | 171        |
| MT32       | 38.485                 | 25.383                  | 73.677 | 41.673        | 79.961         | 2.62       |
| MT64       | 6.5388                 | 8.8540                  | 88.628 | 61.548        | 96.088         | 3.47       |
| MT128      | 5.6575                 | 6.6818                  | 91.306 | 66.691        | 97.228         | 7.33       |
| MT256      | 5.5276                 | 6.6185                  | 91.335 | 66.994        | 97.236         | 29.5       |
| MT512      | 5.5109                 | 6.6117                  | 91.347 | 66.995        | 97.239         | 204        |
| DC32       | 41.570                 | 28.735                  | 70.134 | 37.162        | 74.564         | 2.46       |
| DC64       | 6.9833                 | 9.9407                  | 87.627 | 59.704        | 95.506         | 2.61       |
| DC128      | 5.6615                 | 6.7204                  | 91.304 | 66.562        | 97.215         | 3.76       |
| DC256      | 5.5449                 | 6.6735                  | 91.349 | 66.921        | 97.220         | 16.2       |
| DC512      | 5.5421                 | 6.6165                  | 91.355 | 66.927        | 97.221         | 177        |
| Ours       | 5.5049                 | 6.5401                  | 91.451 | 67.153        | 97.239         | 20.8       |
